# Supplementary material
Source: Springer Nature journal article supplement (https://www.springermedizin.de/resource/supplementary/12936_2010_1711_MOESM6_ESM.pdf/9541566)

### Mugil (n=36)

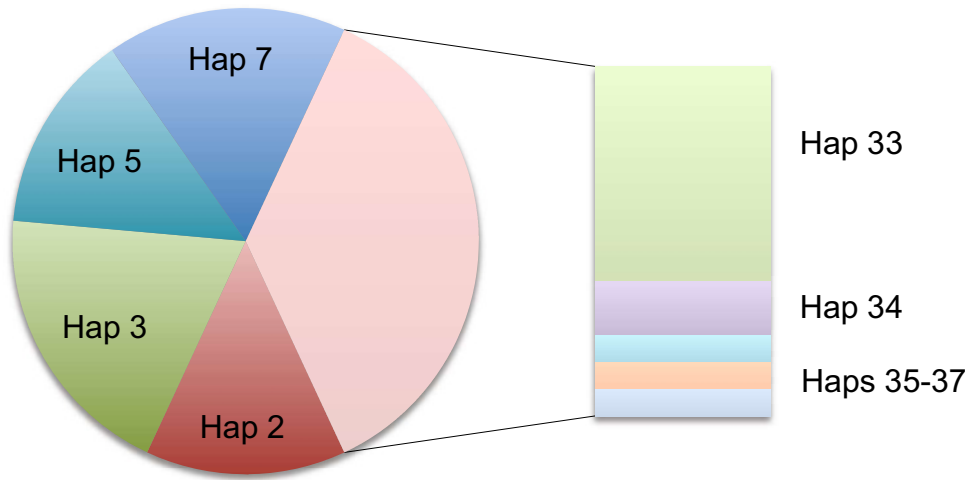

### Wosera (n = 23)

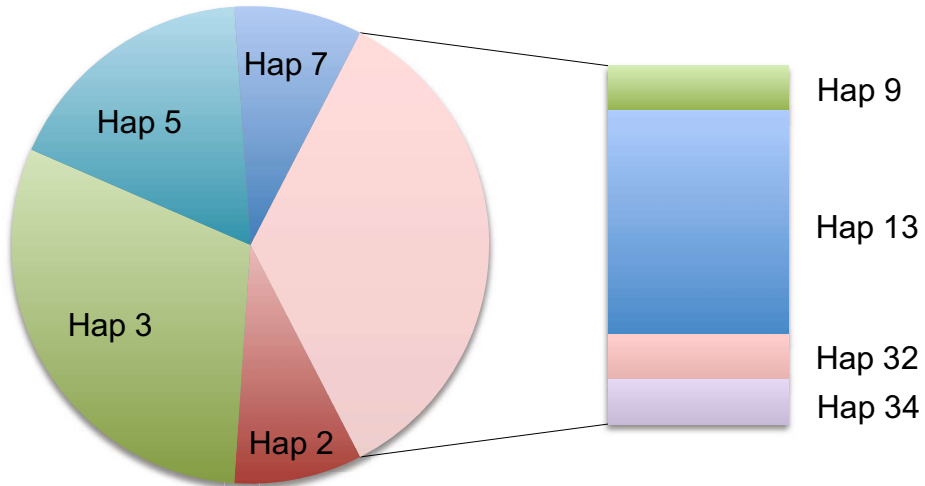

### Gambia (n=88)

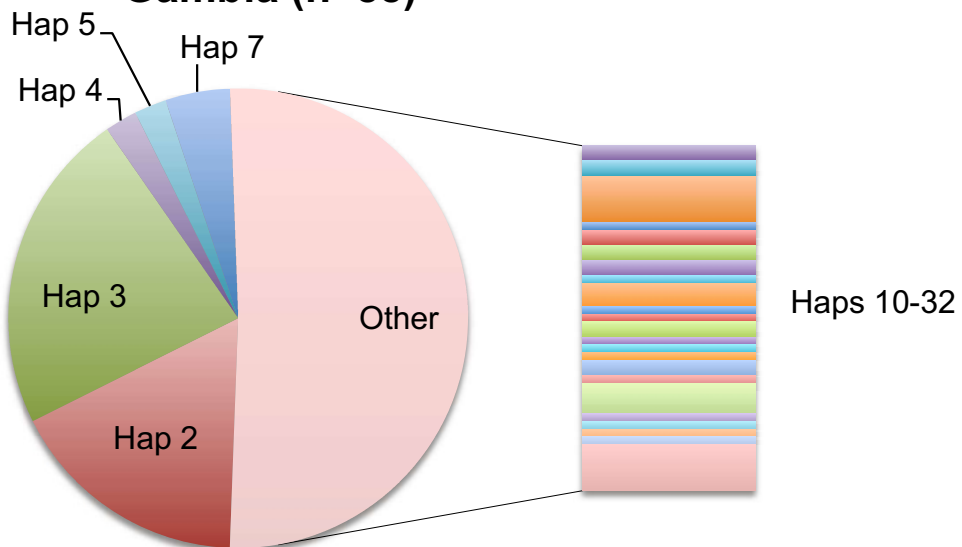

Supplement: MOESM6 [file 9541566]
